# Supplementary material for: Species-specific progenitor sub-domain extends neurogenesis and increases human motor neuron production
Source: Research Square preprint supplement (doi:10.21203/rs.3.rs-2855830/v1), 2023-06-22
Supplement: Supplementary file 2 [file 509d9ad3b3963fc872dff342.pdf]

**Acknowledgments:** We would like to thank Dr. Grace Yeo and Dr. David Gifford for help with and access to their shared computing server, Erin Bush and Michael Finlayson of the Columbia University Sulzberger Genome Center for running the 10X single-cell library prep and sequencing, Mike Kissner and the CSCI Stem Cell Facility for assistance with flow cytometry. We would like to thank Dr. Carol Marchetto for kindly sharing Rhesus macaque iPS cells and culture conditions. We would like to thank Sophia DiIorio for designing and testing sequencing primers for barcode analysis, and Dr. Gist Croft for immunostained human embryonic spinal cord images. We are also grateful to Dr. Carol Mason, Dr. Franck Polleux, Dr. Michael Closser and members of the Wichterle, Chaolin Zhang and Edmund Au labs for discussion and feedback.

**Funding:**

Jerry and Emily Spiegel endowed chair (HW)

National Institutes of Health grant R01NS109217 (HW)

National Institutes of Health grant R01NS116141 (HW)

National Institutes of Health grant R01NS089676 (HW)

Project ALS (HW)

Columbia Stem Cell Initiative seed grant (SJ)

**Author contributions:**

Conceptualization: SJ, HW

Experiments: SJ

Data analysis: SJ

Human NKX2-2-CreERT2 iPS cell line generation: EG

Writing – original draft: SJ, HW

Writing – review & editing: SJ, HW

**Competing interests:** Authors declare that they have no competing interests.

**Data and materials availability:** Single-cell RNA-seq data will be made publicly available upon peer-reviewed publication on the GEO database. Cell lines (embryonic pluripotent stem cell and

induced pluripotent stem cell lines), along with plasmids and viral constructs will be made freely available to investigators at academic institutions for non-commercial research upon request (correspondence to Hynek Wichterle).

**Code availability:** Custom MATLAB and R codes will be made available on Github.

**Public datasets mentioned:**

Mouse in vivo single-cell RNA-seq data: E-MTAB-7320

Human in vivo single-cell RNA-seq data: GSE171890
