# Supplementary material for: Species-specific progenitor sub-domain extends neurogenesis and increases human motor neuron production
Source: Research Square preprint supplement (doi:10.21203/rs.3.rs-2855830/v1), 2023-06-22
Supplement: Supplementary file 3 [file abaae107c6dad866989459ae.pdf]

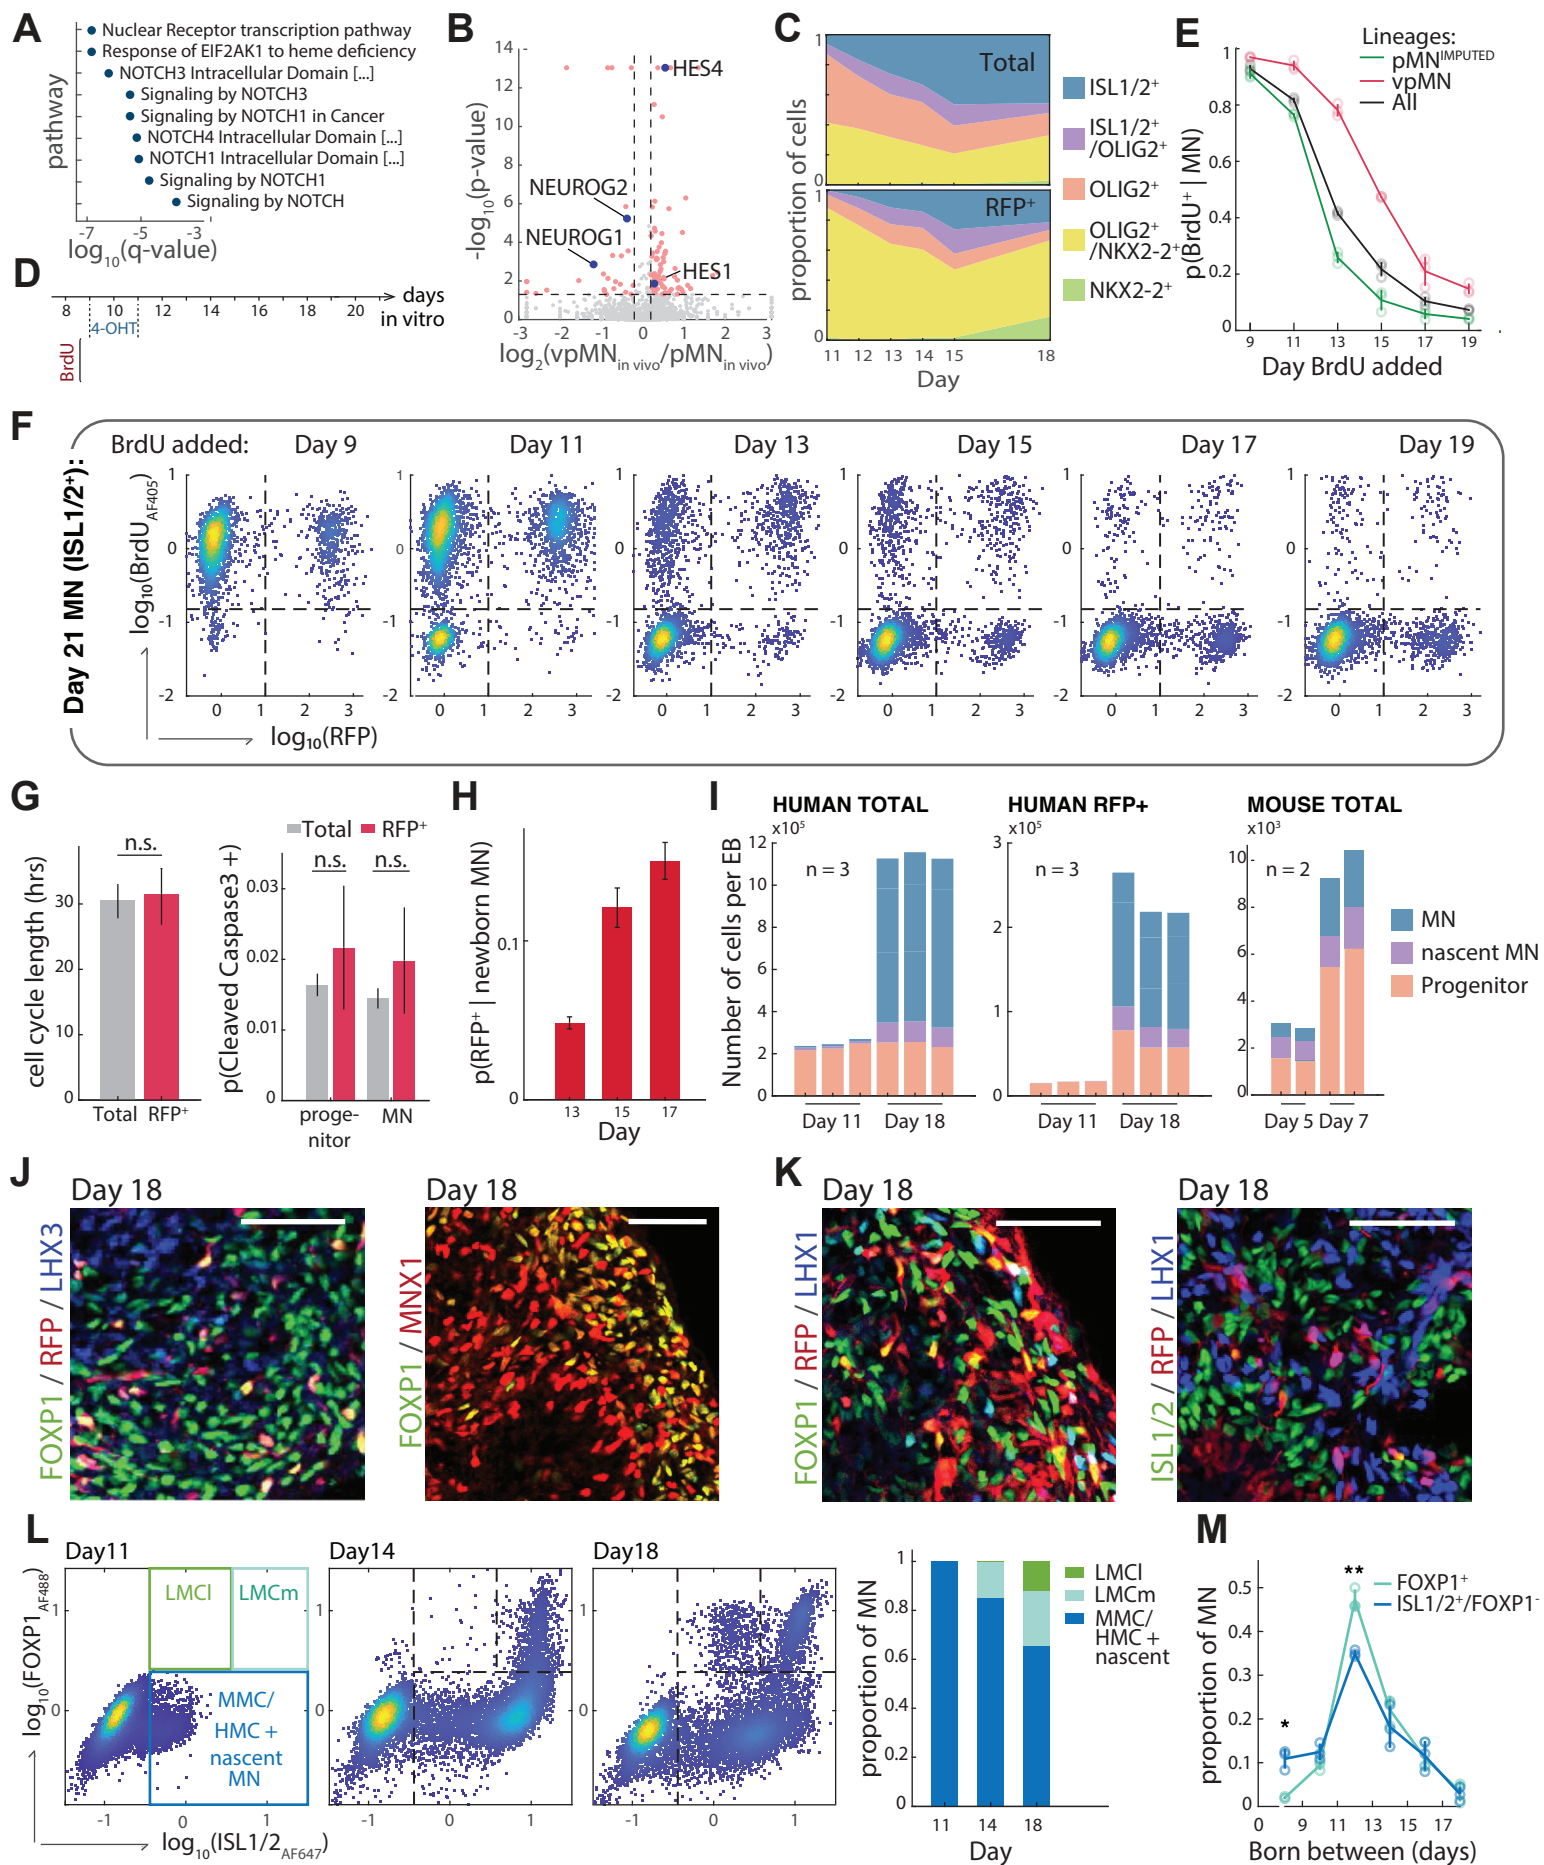

Supplemental figure 3

**Supplemental figure 3.** (A) Top enriched pathways in Reactome analysis of genes upregulated in vpMN relative to pMN ( $q\text{-value} \leq 0.001$ ). (B) Differential gene expression analysis between in vivo vpMN (H<sub>E</sub>4) and pMN (H<sub>E</sub>1) clusters shows that, similar to in vitro, vpMNs display characteristics of higher Notch activity relative to pMNs. (C) Changes in the proportion of progenitor and MN populations over time in total and RFP<sup>+</sup> populations (replicate of Figure 3B). (D) Schematic of cumulative BrdU labeling assay to derive MN birthcurve for vpMN and pMN lineages. (E) Changes in the proportion of BrdU<sup>+</sup>, day 21 MNs for vpMN (RFP<sup>+</sup>), total and pMN<sup>IMPUTED</sup> lineages following cumulative BrdU labeling at progressively later timepoints ( $n = 3$ ; all scale bars in figure indicate S.D.). Despite all three curves starting at close to 100% (indicating that most vpMNs and pMNs are mitotic at day 9), the vpMN curve is right-shifted, indicating that RFP<sup>+</sup> vpMNs remain mitotic for longer. (F) Flow cytometry plots for day 21 human cultures (only ISL1/2<sup>+</sup> MNs shown) treated with BrdU starting at progressively later timepoints show slower decrease in BrdU<sup>+</sup> MNs in RFP<sup>+</sup> compared to RFP<sup>-</sup> populations. (G) Left: Estimation of cell cycle length based on EdU pulse-labeling shows that RFP<sup>+</sup> have similar cell cycle length compared to the total cells. Right: RFP<sup>+</sup> and RFP<sup>-</sup> cells display similar proportions of cleaved Caspase-3-positive progenitors and motor neurons, indicating that cell death rates are similarly low for vpMN and pMN lineages. (H) Proportion of RFP<sup>+</sup> cells within newborn motor neuron population (as determined by BrdU labeling) increases over time, indicating that vpMNs undergo delayed neurogenesis ( $n = 3$ ). (I) Numbers of motor neuron progenitors and motor neurons at the onset of and tail-end of neurogenesis in both mouse and human, numbers for each replicate shown separately. (J) Day 18 human cultures immunostained for FOXP1, LHX3 and MNX1 show that FOXP1<sup>+</sup> cells are LHX3<sup>-</sup> and MNX1<sup>+</sup>, indicating that they are LMC-like MNs (Scale bars = 50 $\mu$ m). (K) Day 18 human cultures immunostained for FOXP1, LHX1 and ISL1/2 show that LHX1 is expressed in a subset of FOXP1 cells but is not co-expressed with ISL1/2, suggesting that FOXP1<sup>+</sup>/LHX1<sup>+</sup> cells are LMC-I-like MNs (Scale bars = 50 $\mu$ m). (L) Flow cytometry plots for human cultures at days 11-18 show sequential appearance of MMC/HMC-, LMCm- and LMCI-like MNs ( $n = 1$ ). (M) Cumulative BrdU labeling, followed by immunolabeling for FOXP1 and ISL1/2 reveal that FOXP<sup>+</sup> and FOXP<sup>-</sup> MNs have overlapping birth curves, with FOXP<sup>+</sup> MNs being born slightly later ( $n = 3$ ).
