# Supplementary material for: Species-specific progenitor sub-domain extends neurogenesis and increases human motor neuron production
Source: Research Square preprint supplement (doi:10.21203/rs.3.rs-2855830/v1), 2023-06-22
Supplement: Supplementary file 4 [file b0ba062b9b69b28f87ef7ece.pdf]

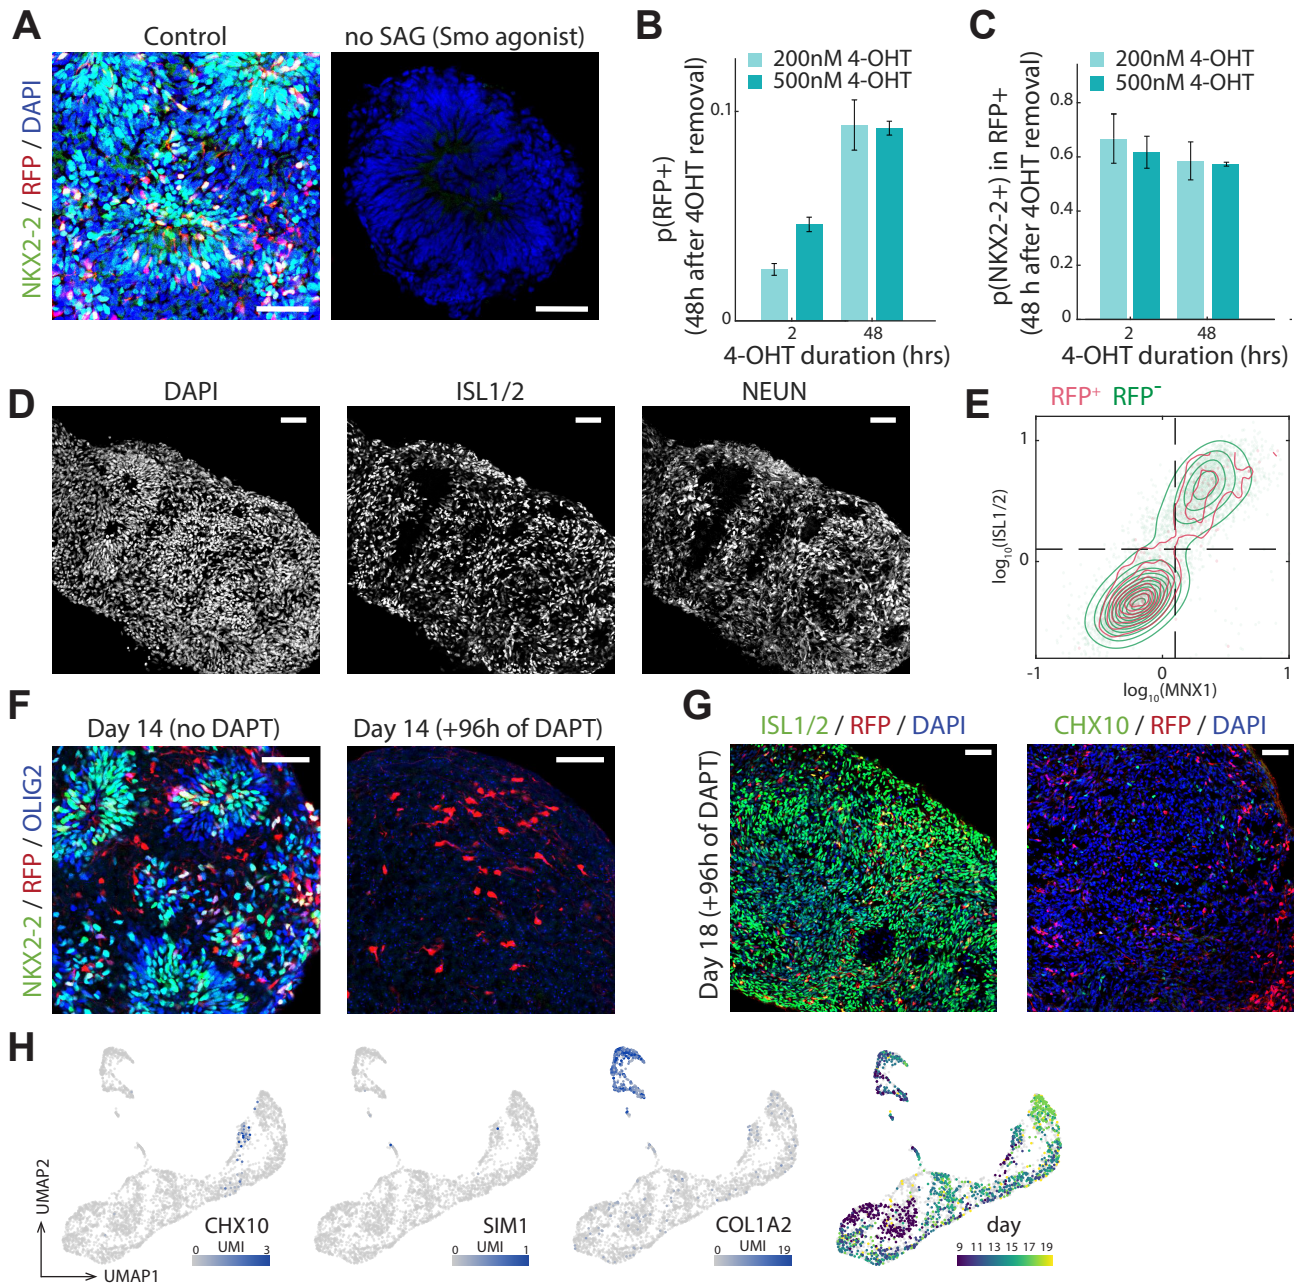

**Supplemental figure 2.** (A) Day 12 human embryoid bodies differentiated with and without SAG (Smoothed agonist) with 4OHT pulse between days 9-11 show that in the absence of SAG, NKX2-2 expression as well as Cre-dependent recombination is lost (All scale bars in figure = 50  $\mu$ m). (B) Varying lengths and concentrations of 4OHT pulse affect the efficiency of recombination-based RFP expression (n = 3; all scale bars in figure indicate S.D.). (C) Proportions of NKX2-2-positive cells within RFP-positive populations on day 13, 48 hours post 4OHT removal (n = 3). (D) Immunostaining day 16 human cultures with pan-neuronal marker NEUN and ISL1/2 shows that the vast majority of neurons produced are motor neurons. (E) Flow cytometry analysis of day 16 human cultures shows that the vast majority of ISL1/2-positive cells are MNX1-positive and vice versa in both RFP<sup>+</sup> and RFP<sup>-</sup> populations (representative differentiation, n = 1, sample pooled across 50+ EBs). (F) Human cultures following 4OHT treatment on days 9-11 show that many RFP<sup>+</sup> cells retain progenitor identity (OLIG2<sup>+</sup> or OLIG2<sup>+</sup>/NKX2-2<sup>+</sup>) on day 14; however, with DAPT treatment, virtually no cells express OLIG2 or NKX2-2. (G) Majority of cells in human cultures express ISL1/2 in response to DAPT, with a small fraction (<1%) of cells expressing V2 interneuron marker CHX10. (H) UMAP of all high-quality human scRNA-seq profiles, colored based on expression of V2 and V3 interneuron markers (CHX10 and SIM1), fibroblast marker (COL1A2), and timestamp identity.

## Supplemental figure 2
