# Supplementary material for: Species-specific progenitor sub-domain extends neurogenesis and increases human motor neuron production
Source: Research Square preprint supplement (doi:10.21203/rs.3.rs-2855830/v1), 2023-06-22
Supplement: Supplementary file 5 [file dfe2be88505e2d1ee644a3c2.pdf]

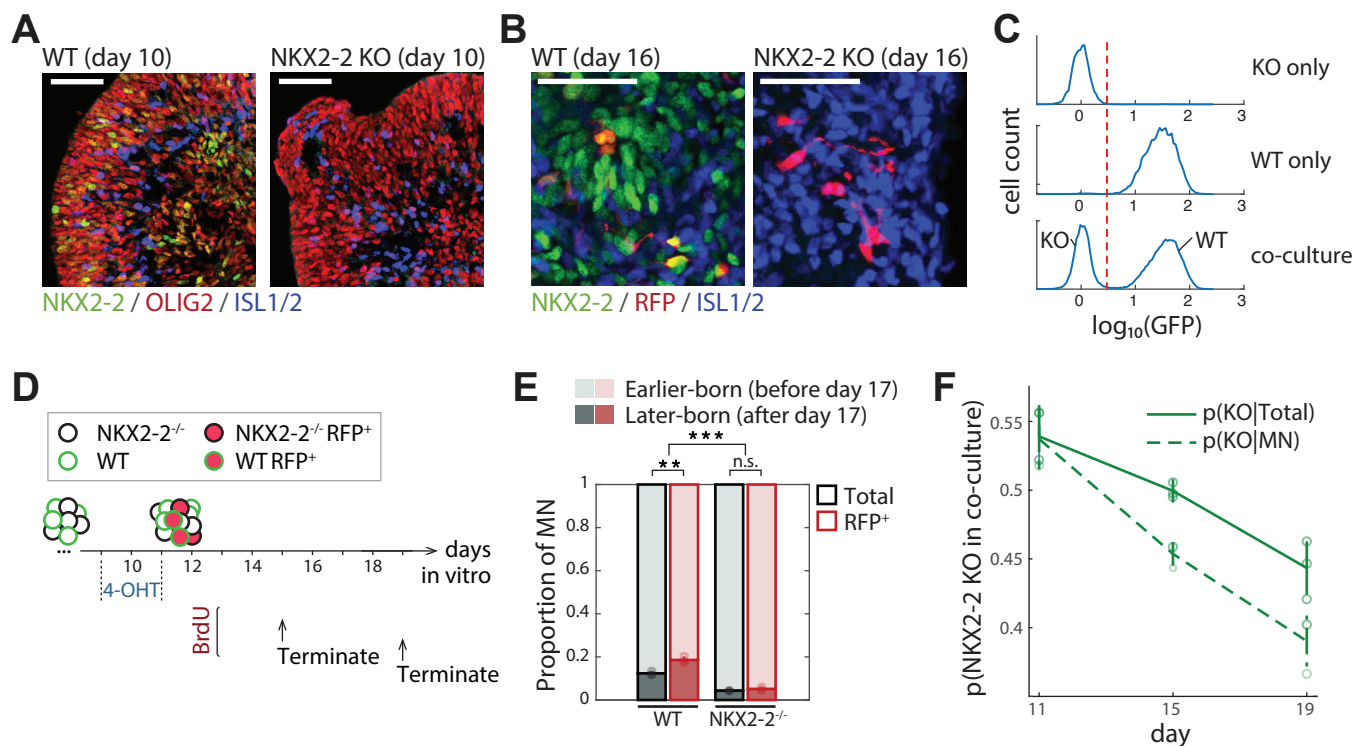

**Supplemental figure 4.** (A) Both WT and NKX2-2 KO cultures display broad OLIG2 expression and begin to show ISL1/2<sup>+</sup> MNs at day 10. (B) NKX2-2 KO cells lack NKX2-2 immunoreactivity in both RFP<sup>+</sup> and RFP<sup>-</sup> cells. (C) GFP-expressing WT cells can easily be distinguished from NKX2-2 KO cells in co-cultures. (D) Schematic for BrdU pulse-labeling. (E) Proportion of MNs born after day 17 (assessed at day 19) in WT and NKX2-2 KO MNs (RFP<sup>+</sup> and total) show a ~2.5-fold-change between WT and KO cells (n = 3; all error bars in figure indicate S.D.). (F) The proportion of GFP- NKX2-2 KO cells decreases over time in co-cultures, both in total and MN populations (n = 3).

**Supplemental figure 4**
