# Supplementary material for: Species-specific progenitor sub-domain extends neurogenesis and increases human motor neuron production
Source: Research Square preprint supplement (doi:10.21203/rs.3.rs-2855830/v1), 2023-06-22
Supplement: Supplementary file 6 [file eb77a6361a29ec524c624de1.pdf]

**Supplemental Table 1:**

List of genes upregulated in H3-5 (vpMN) compared to H1-2 (pMN).
